# Supplementary material
Source: PubMed Central journal article supplement (PMC5833516)

## Supplementary Online Content

Gray N, Howard A, Zhu J, Feldman LY, To T. Association between inhaled corticosteroid use and bone fracture in children with asthma. *JAMA Pediatr*. Published online November 13, 2017. doi:10.1001/jamapediatrics.2017.3579

**eTable.** ICD-10 Codes Used to Define Fracture, Asthma and Organ Transplant

**eFigure.** Study Flow Diagram Showing Case and Control Selection From Original Study Cohort

This supplementary material has been provided by the authors to give readers additional information about their work.

**eTable.** ICD-10 Codes Used to Define Fracture, Asthma and Organ Transplant

| <b>Health Condition</b> | <b>ICD-10 Codes</b>                                                            |
|-------------------------|--------------------------------------------------------------------------------|
| Fracture                | S02, S12, S22, S32, S42, S52, S62, S72, S82, S92, T02, T08, T10, T12, T14, M80 |
| Asthma                  | J45, J46                                                                       |
| Organ Transplant        | Z94, T86, Z76.82                                                               |

**eFigure.** Study Flow Diagram Showing Case and Control Selection From Original Study Cohort

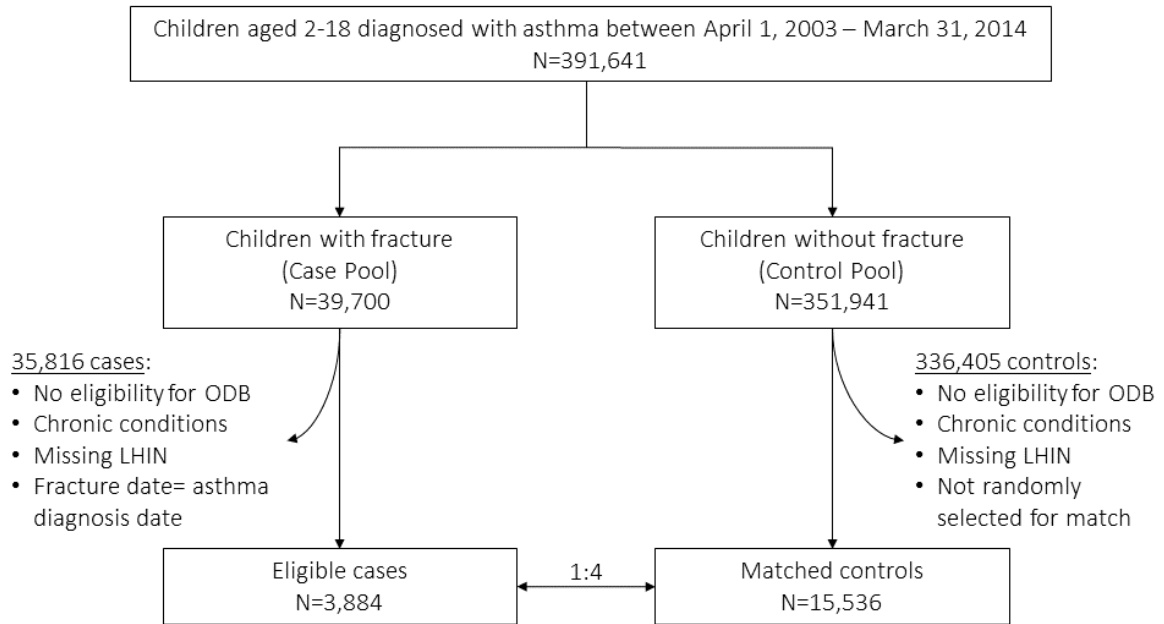

Supplement: jamapediatr-172-57-s001.pdf [file jamapediatr-172-57-s001.pdf]
